# Supplementary material for: Smartphone‐based Ecological Momentary Assessment to study “scanxiety” among Adolescent and Young Adult survivors of childhood cancer: A feasibility study
Source: PubMed Central journal article supplement (PMC9545782; doi:10.1002/pon.5935), 2022-04-25
Supplement: PON-31-1322-s002.pdf [file PON-31-1322-s002.pdf]

## Appendix B

### Feedback Survey

#### Close-Ended Questions:

- a. How easy was the app for you to use?
  - i. 1 – very difficult
  - ii. 2
  - iii. 3
  - iv. 4
  - v. 5 – very easy
- b. How much did you enjoy using the app?
  - i. 1 – not at all
  - ii. 2
  - iii. 3
  - iv. 4
  - v. 5 – very much
- c. How understandable were the questions?
  - i. 1. – difficult to understand
  - ii. 2
  - iii. 3
  - iv. 4
  - v. 5 – easy to understand
- d. How helpful were the questions in describing your daily feelings?
  - i. 1 – very unhelpful
  - ii. 2
  - iii. 3
  - iv. 4
  - v. 5 – very helpful
- e. How distressing did you find it to answer the questions?
  - i. 1 – not at all distressing
  - ii. 2
  - iii. 3
  - iv. 4
  - v. 5 – very distressing
- f. Was the amount of time it took to complete the questions acceptable?
  - i. 1 – very unacceptable
  - ii. 2
  - iii. 3
  - iv. 4
  - v. 5 – very acceptable
- g. Would it have been acceptable to complete 5 surveys per day?
  - i. Yes, this would be acceptable
  - ii. Yes, but only if the surveys were shorter
  - iii. No
- h. How much did completing the questions interfere with your daily activities?
  - i. 1 – interfered greatly

- ii. 2
  - iii. 3
  - iv. 4
  - v. 5 – did not interfere
- i. On average, how many times each day did you think about cancer throughout this study?
- i. No times
  - ii. One time
  - iii. Two times
  - iv. Three times
  - v. Four or more times
- j. On average, how much did you worry about cancer each day, throughout this study?
- i. 0, Not at all
  - ii. 1, A little bit
  - iii. 2, Somewhat
  - iv. 3, Quite a bit
  - v. 4, A whole lot

Open-Ended Questions:

- k. What was your overall experience of participating in this study?
- l. When did you find it easiest and hardest to answer the questions?
- m. Did you have any concerns arise while answering the questions?
- n. What suggestions do you have for how we could make the experience better for future study participants?
